# Supplementary material
Source: Springer Nature journal article supplement (https://www.springermedizin.de/resource/supplementary/12985_2010_1017_MOESM4_ESM.pdf/9608956)
Supplement: MOESM4 [file 9608956]

MTYPRRRYRHHRRPRSHLGQILRRRPWLHVHPRHRYRWRKNGIFNTRLRSRTFGYTIKRTTVKTPSNAVDMRRFNINDFL Majority

|   | 10 | 20 | 30 | 40 | 50 | 60  | 70  | 80  |     |
|---|----|----|----|----|----|-----|-----|-----|-----|
| 1 |    |    |    |    | A  | A   |     |     | YJ  |
| 1 | F  |    |    |    |    | I   | V.K | R.N | AH  |
| 1 | F  | S  |    |    |    | I   | V.K | R.N | MDJ |
| 1 | F  |    |    |    |    | I   | V.K | R.N | BDH |
| 1 |    |    |    |    |    |     | V   | R   | AS  |
| 1 | H  |    |    |    |    |     |     |     | BY  |
| 1 |    |    |    | C  |    |     |     |     | CF  |
| 1 |    |    |    |    |    |     |     |     | HL  |
| 1 |    |    |    |    |    |     |     |     | HN  |
| 1 |    | G  |    |    | T  |     |     |     | JF  |
| 1 |    |    |    |    |    |     |     |     | JMS |
| 1 |    |    | R  |    |    |     |     |     | JS  |
| 1 |    |    |    |    | R  |     |     |     | MZL |
| 1 |    |    | R  |    |    |     |     |     | QTH |
| 1 |    |    |    |    |    |     |     |     | SH  |
| 1 |    |    |    |    |    |     |     |     | SY  |
| 1 |    |    |    |    |    |     | R   |     | WF  |
| 1 | F  | L  |    |    | S  | V.A | R   | T.I | CL  |
| 1 | F  | L  |    |    | C  | V.A | R   |     | LG  |

PPGGGSNPRSVPFYYRIRKVKVEFWPCSEITQDGRGVGSSAVILDDNFVTKATALTYDPYVNYSSRHTITQPFYSHSRY Majority

|     | 90   | 100 | 110 | 120 | 130 | 140 | 150 | 160 |     |
|-----|------|-----|-----|-----|-----|-----|-----|-----|-----|
| 241 |      |     |     | A   |     |     |     |     | YJ  |
| 241 | LT   |     |     | T   |     | N   |     |     | AH  |
| 241 | LT   |     |     | T   |     | N   |     |     | MDJ |
| 241 | LT   |     |     | T   |     | N   |     |     | BDH |
| 241 |      |     |     |     |     |     |     |     | AS  |
| 241 |      |     |     |     |     |     |     |     | BY  |
| 241 |      |     |     |     |     |     |     |     | CF  |
| 241 |      |     |     |     |     |     |     |     | HL  |
| 241 |      |     |     |     |     |     |     |     | HN  |
| 241 |      |     |     |     |     |     |     |     | JF  |
| 241 |      |     |     |     |     |     |     |     | JMS |
| 241 |      | M   |     |     |     |     |     |     | JS  |
| 241 |      |     |     |     |     |     |     |     | MZL |
| 241 |      |     |     |     |     |     |     |     | QTH |
| 241 |      |     |     |     |     |     |     |     | SH  |
| 241 |      |     |     |     |     |     |     |     | SY  |
| 241 |      |     |     |     |     |     |     |     | WF  |
| 241 | T.KI | I.Q |     | I   | T   |     |     | P   | CL  |
| 241 | T.EI | I   |     | T   |     | R   | G   | P   | LG  |

FTPFPVLDS TIDYFQPNKRNLQLLRLQTAGNVHDVGLGTAFENSIYDQEYNIRVTMYVQFREFNLKDPPLNP--- Majority

|     | 170 | 180 | 190 | 200 | 210 | 220 | 230 |     |
|-----|-----|-----|-----|-----|-----|-----|-----|-----|
| 481 |     |     |     |     |     |     | ENE | YJ  |
| 481 | R   |     | T   |     | D   | I   | K   | AH  |
| 481 | R   |     | T   |     | D   | I   | K   | MDJ |
| 481 | R   |     | T   |     | D   | I   | K   | BDH |
| 481 |     |     |     |     |     |     |     | AS  |
| 481 |     |     |     |     |     |     |     | BY  |
| 481 |     |     |     |     |     |     |     | CF  |
| 481 |     |     |     |     |     |     |     | HL  |
| 481 |     |     |     |     |     |     |     | HN  |
| 481 |     |     |     |     |     |     |     | JF  |
| 481 |     |     | I   |     |     |     |     | JMS |
| 481 |     |     |     |     |     |     |     | JS  |
| 481 |     |     |     |     |     |     |     | MZL |
| 481 |     |     |     |     |     |     |     | QTH |
| 481 | L   |     |     |     |     | A   | T   | SH  |
| 481 |     |     |     |     |     |     |     | SY  |
| 481 |     |     | SA  | I   | K   | D   |     | CL  |
| 481 |     |     | SA  | I   | T   | D   |     | LG  |
